# Supplementary material
Source: publisher figshare collection journal article supplement (https://gsajournals.figshare.com/ndownloader/files/12835427)
Supplement: Supplementary file 1 [file 12835427]

**Table S1. Oligomers used for Splinkerette sequencing of PCR products to determine piggyBac insertion sites in the *Anopheles stephensi* genome.**

| Oligomer† | Sequence (5’ -> 3’) | Purpose |
| --- | --- | --- |
| Splinkerette adapter (top strand) | GATCCCACTAGTGTCGACACCAGTCTCTAATTTTTTTTTTCAAAAAAA | adapter tagging of the unknown genomic BstY1/BglII cut site |
| Splinkerette adapter (bottom strand) | CGAAGAGTAACCGTTGCTAGGAGAGACCGTGGCTGAATGAGACTGGTGTCGACACTAGTGG | adapter tagging of the unknown genomic BstY1/BglII cut site |
| Splink #1 | CGAAGAGTAACCGTTGCTAGGAGAGACC | Forward primer for first PCR |
| Splink #2 | GTGGCTGAATGAGACTGGTGTCGAC | Semi-nested forward primer for second PCR |
| 3’ Splink PB#1 | GTTTGTTGAATTTATTATTAGTATGTAAG | 3’-piggyBac end reverse primer for first PCR |
| 3’ Splink PB#2 | CGATAAAACACATGCGTC | 3’-piggyBac end nested reverse primer for second PCR |
| 3’ Splink PB SEQ | ACGCATGATTATCTTTAAC | Nested sequencing primer for amplified 3’-piggyBac/genomic tag ends |
| 5’ Splink PB#1 | ACCGCATTGACAAGCACG | 5’-piggyBac end reverse primer for first PCR |
| 5’ Splink PB#2 | CTCCAAGCGGCGACTGAG | 5’-piggyBac end nested reverse primer for second PCR |
| 5’ Splink PB SEQ | CGACTGAGATGTCCTAAATGC | Nested sequencing primer for amplified 5’-piggyBac/genomic tag ends |

†Primers and table extracted from Supplementary Splinkerette Protocol Luo and Potter (2010) for piggyBac insertion detection
